# Supplementary material for: Physiological characteristics of Magnetospirillum gryphiswaldense MSR-1 that control cell growth under high-iron and low-oxygen conditions
Source: PubMed Central journal article supplement (PMC5459824; doi:10.1038/s41598-017-03012-4), 2017-06-05
Supplement: 41598_2017_3012_MOESM1_ESM.pdf [file 41598_2017_3012_MOESM1_ESM.pdf]

## **Physiological characteristics of *Magnetospirillum gryphiswaldense* MSR-1 that control cell growth under high-iron and low-oxygen conditions**

Qing Wang<sup>1,5#</sup>, Xu Wang<sup>1,5#</sup>, Weijia Zhang<sup>2,5</sup>, Xianyu Li<sup>3</sup>, Yuan Zhou<sup>1</sup>, Dan Li<sup>1</sup>, Yinjia Wang<sup>4</sup>, Jiesheng Tian<sup>1,5</sup>, Wei Jiang<sup>1,5</sup>, Ziding Zhang<sup>1</sup>, Youliang Peng<sup>1</sup>, Lei Wang<sup>4</sup>, Ying Li<sup>1,5\*</sup>, Jilun Li<sup>1,5</sup>

<sup>1</sup> State Key Laboratories for Agro-biotechnology, China Agricultural University, Beijing, 100193, P. R. China.

<sup>2</sup> Institute of Deep-sea Science and Engineering, China Academy of Sciences, Sanya, 572000, P.R. China

<sup>3</sup> Beijing Key Laboratory of Traditional Chinese Medicine Basic Research on Prevention and Treatment for Major Diseases, Experimental Research Center, China Academy of Chinese Medical Sciences, Beijing, 100700, China

<sup>4</sup> Tianjin Biochip Corporation, Tianjin, 300457, P. R. China.

<sup>5</sup> France-China Bio-mineralization and Nano-structure Laboratory, Beijing, 100193, P. R. China.

# These authors contributed equally to this study.

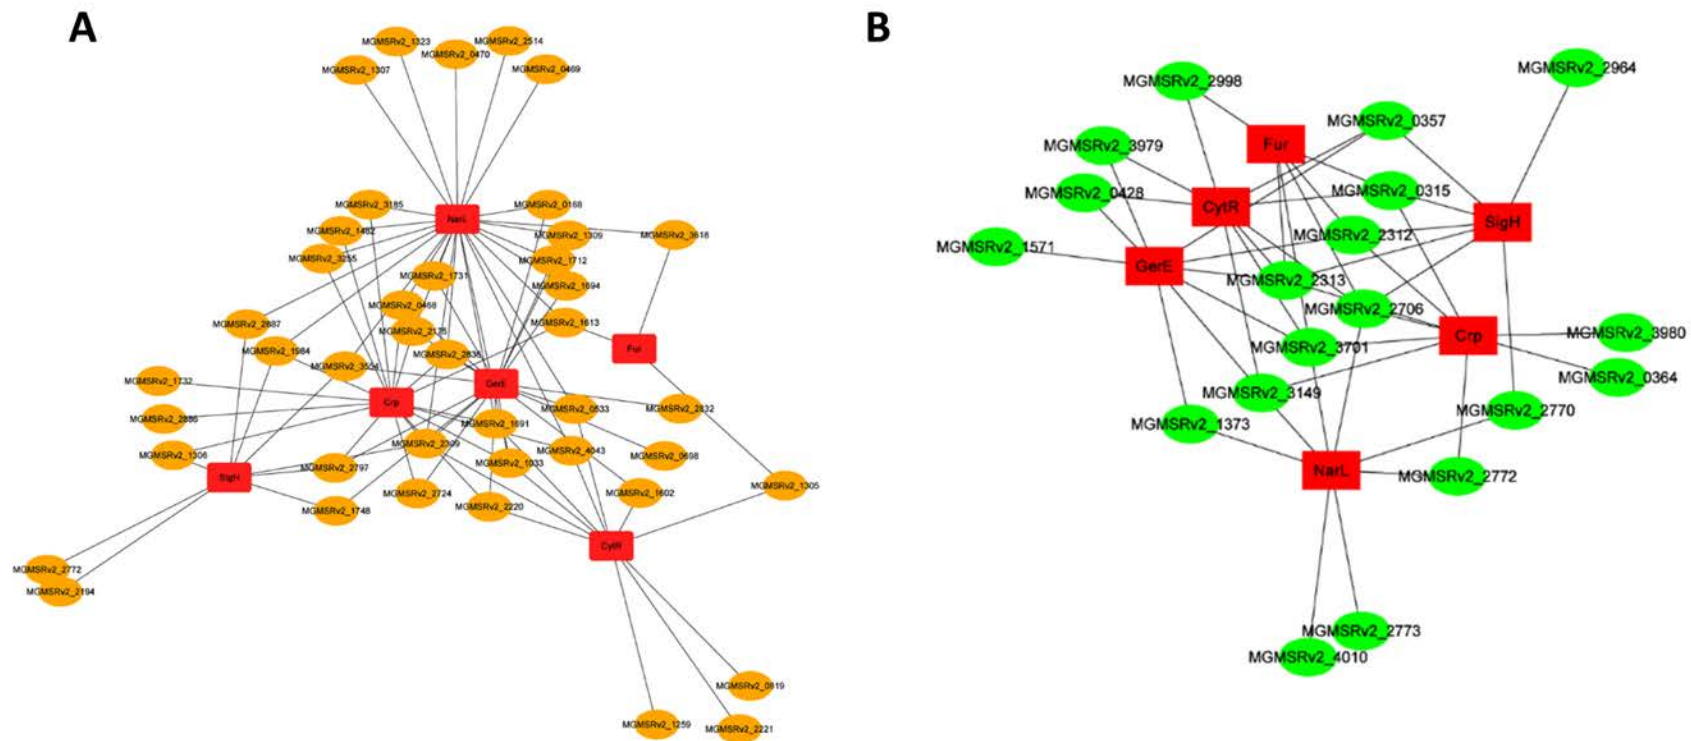

Figure S1. Proposed regulatory network of DEGs using the Cytoscape 3 software program. TFs are represented by red rectangles, and DEGs by colored ellipses: yellow for upregulated genes (A) and green for downregulated genes (B) under high-iron condition. Black lines: TF regulation of genes.

Table S1. Detailed information on DEGs under high and low-iron conditions: gene ID, gene name, and FPKM value used for RNA-seq analysis under the two conditions.

| Gene ID      | Gene products                                                                                                                                         | FPKM<br>(high-iron) | FPKM<br>(low-iron) | p-value  |
|--------------|-------------------------------------------------------------------------------------------------------------------------------------------------------|---------------------|--------------------|----------|
| MGMSRv2_0065 | Thiamine biosynthesis protein ThiC (5"-phosphoryl-5-aminoimidazole, 4-amino-5-hydroxymethyl-2-methylpyrimidine-P)                                     | 52.6395             | 125.04             | 1.01E-06 |
| MGMSRv2_0168 | Putative GGDEF: diguanylate cyclase (GGDEF) domain                                                                                                    | 58.9327             | 27.5131            | 0.000102 |
| MGMSRv2_0315 | Ferrous iron transport protein B2                                                                                                                     | 23.0569             | 52.5498            | 2.1E-05  |
| MGMSRv2_0357 | Nif-specific regulatory protein, NifA                                                                                                                 | 16.3435             | 34.618             | 0.000879 |
| MGMSRv2_0364 | Nitrogen regulatory protein PII,GlnB                                                                                                                  | 28.95               | 117.393            | 0.000822 |
| MGMSRv2_0428 | Putative AraC-type DNA-binding domain-containing proteins                                                                                             | 3.78227             | 56.4968            | 2.19E-07 |
| MGMSRv2_0468 | Sulfite reductase                                                                                                                                     | 112.448             | 32.6438            | 1.33E-11 |
| MGMSRv2_0469 | Phosphoadenosine phosphosulfate reductase(3'-phosphoadenosine 5'-phosphosulfate sulfotransferase (PAPS reductase)/FAD synthetase and related enzymes) | 295.688             | 119.576            | 8.93E-07 |
| MGMSRv2_0470 | Sulfate adenylyltransferase subunit                                                                                                                   | 236.911             | 117.479            | 0.000105 |

|              |                                                                                      |         |         |          |
|--------------|--------------------------------------------------------------------------------------|---------|---------|----------|
| MGMSRv2_0533 | Putative acetyl esterase                                                             | 163.246 | 32.2799 | 1.89E-14 |
| MGMSRv2_0698 | Conserved protein of unknown function                                                | 156.053 | 89.7898 | 0.000516 |
| MGMSRv2_0819 | Signal transduction histidine-protein kinase BarA (fragment)                         | 71.1842 | 39.2313 | 0.000773 |
| MGMSRv2_1033 | Ferredoxin--NADP reductase (=Flavodoxin reductase)                                   | 1015.7  | 464.404 | 3.94E-07 |
| MGMSRv2_1259 | Putative sulfide dehydrogenase (flavocytochrome c) flavoprotein chain precursor      | 258.916 | 104.431 | 9.34E-08 |
| MGMSRv2_1305 | 4Fe-4S ferredoxin, iron-sulfur binding                                               | 331.701 | 134.502 | 7.9E-08  |
| MGMSRv2_1306 | Cyclic nucleotide-binding                                                            | 70.312  | 17.7562 | 6.64E-05 |
| MGMSRv2_1307 | Oxidoreductase FAD/NAD(P)-binding                                                    | 109.376 | 43.0799 | 1.43E-05 |
| MGMSRv2_1309 | Nickel-dependent hydrogenase, large subunit                                          | 119.063 | 58.4312 | 0.000116 |
| MGMSRv2_1323 | NADH-quinone oxidoreductase chain E (NADH dehydrogenase I, chain E) (NDH-1, chain E) | 249.773 | 131.743 | 0.000696 |
| MGMSRv2_1337 | Conserved hypothetical protein                                                       | 174.238 | 91.5624 | 0.000185 |
| MGMSRv2_1373 | Conserved protein of unknown function                                                | 58.8058 | 196.54  | 2.43E-05 |
| MGMSRv2_1436 | Acriflavin resistance protein                                                        | 36.8293 | 9.783   | 2.91E-10 |
| MGMSRv2_1437 | Membrane-fusion protein                                                              | 38.2438 | 9.15448 | 1.38E-07 |

|              |                                                                                               |         |         |          |
|--------------|-----------------------------------------------------------------------------------------------|---------|---------|----------|
| MGMSRv2_1482 | 3-oxoacyl-[acyl-carrier-protein] synthase II (Beta- ketoacyl-ACP synthase II) (KAS II)        | 214.926 | 120.983 | 0.000774 |
| MGMSRv2_1571 | Putative Iron-utilization periplasmic protein                                                 | 13.2457 | 102.283 | 1.47E-12 |
| MGMSRv2_1602 | Putative CpaC-related secretion pathway protein                                               | 345.669 | 165.153 | 0.000221 |
| MGMSRv2_1613 | Protein of unknown function                                                                   | 62.607  | 30.2113 | 0.000421 |
| MGMSRv2_1691 | Methyl-accepting chemotaxis sensory transducer                                                | 87.5938 | 45.3804 | 0.000569 |
| MGMSRv2_1694 | TrkA-C domain protein                                                                         | 205.201 | 95.1936 | 3.59E-06 |
| MGMSRv2_1712 | Cysteine synthase A, O-acetylserine sulfhydrylase A subunit                                   | 68.9543 | 32.1056 | 0.000531 |
| MGMSRv2_1731 | 50S ribosomal subunit protein L13                                                             | 3895.52 | 2290.04 | 0.000151 |
| MGMSRv2_1732 | 30S ribosomal protein S9                                                                      | 1240.1  | 667.099 | 0.000135 |
| MGMSRv2_1748 | Conserved protein of unknown function, containing Cytochrome c domain                         | 619.19  | 320.169 | 0.000321 |
| MGMSRv2_1811 | Putative amino acid dehydrogenase containing NAD(P)-binding domain and ferridoxin-like domain | 432.57  | 256.909 | 0.000744 |
| MGMSRv2_1984 | Protein of unknown function                                                                   | 46789.5 | 29710.4 | 0.000819 |
| MGMSRv2_2175 | ABC-type branched-chain amino acid transport systems, periplasmic component                   | 191.258 | 101.694 | 0.000318 |

|              |                                                                      |         |         |          |
|--------------|----------------------------------------------------------------------|---------|---------|----------|
| MGMSRv2_2192 | Hydrogenase-2 operon protein hybA                                    | 183.639 | 64.9917 | 3.62E-08 |
| MGMSRv2_2194 | Uptake hydrogenase large subunit precursor                           | 172.646 | 87.5135 | 6.21E-05 |
| MGMSRv2_2220 | Protein of unknown function                                          | 90.9857 | 15.1475 | 0.000972 |
| MGMSRv2_2221 | Putative hemerythrin family protein                                  | 156.767 | 67.2728 | 0.000413 |
| MGMSRv2_2309 | Cell wall protein TIR3                                               | 193.054 | 82.8466 | 2.71E-05 |
| MGMSRv2_2312 | FeoB1                                                                | 137.097 | 426.908 | 1.06E-13 |
| MGMSRv2_2313 | FeoA1                                                                | 486.604 | 1040.02 | 0.000109 |
| MGMSRv2_2514 | Signal transduction histidine kinase                                 | 71.4568 | 39.1659 | 0.00085  |
| MGMSRv2_2515 | Conserved protein of unknown function                                | 549.26  | 202.796 | 2.29E-06 |
| MGMSRv2_2672 | Homocysteine-N5-methyltetrahydrofolate transmethylase, B12-dependent | 152.841 | 250.455 | 0.000716 |
| MGMSRv2_2706 | Nodulation protein nolR                                              | 20.2423 | 657.824 | 0        |
| MGMSRv2_2707 | Response regulator receiver domain protein (CheY)                    | 33.5015 | 232.7   | 2.22E-16 |
| MGMSRv2_2724 | Methyl-accepting chemotaxis sensory transducer                       | 78.2134 | 41.2363 | 0.000609 |
| MGMSRv2_2769 | Putative bacillithiol peroxidase                                     | 127.469 | 335.863 | 4.43E-07 |
| MGMSRv2_2770 | Conserved membrane protein of unknown function                       | 42.9844 | 150.784 | 1.04E-05 |
| MGMSRv2_2771 | GTP cyclohydrolase I                                                 | 96.599  | 226.383 | 1.85E-05 |

|              |                                                                                                                     |         |         |          |
|--------------|---------------------------------------------------------------------------------------------------------------------|---------|---------|----------|
| MGMSRv2_2772 | Conserved hypothetical protein                                                                                      | 49.9038 | 96.6711 | 0.000554 |
| MGMSRv2_2773 | Putative uncharacterized protein                                                                                    | 14.5445 | 45.6646 | 0.000605 |
| MGMSRv2_2779 | Conserved exported protein of unknown function                                                                      | 129.091 | 289.463 | 1.94E-05 |
| MGMSRv2_2780 | Transcriptional activator ChrR                                                                                      | 36.8295 | 105.719 | 2.45E-05 |
| MGMSRv2_2796 | Alkanesulfonate transporter subunit ; membrane component of ABC superfamily                                         | 314.647 | 169.028 | 0.000346 |
| MGMSRv2_2797 | Alkanesulfonate transporter subunit ; periplasmic-binding component of ABC superfamily                              | 620.189 | 349.857 | 0.000252 |
| MGMSRv2_2832 | Putative Cytochrome c domain                                                                                        | 107.569 | 11.259  | 4.71E-10 |
| MGMSRv2_2836 | Methylthioribose-1-phosphate isomerase (methionine salvage pathway)                                                 | 52.7716 | 22.7884 | 0.000314 |
| MGMSRv2_2886 | Molybdopterin synthase sulfurylase                                                                                  | 187.346 | 93.1194 | 0.000198 |
| MGMSRv2_2887 | Pyridoxal-phosphate (PLP) dependent enzymes family; subunit of cysteine synthase A (O-acetylserine sulfhydrylase A) | 264.043 | 140.468 | 0.000281 |
| MGMSRv2_2964 | Putative Chromosomal replication initiator                                                                          | 216.4   | 436.203 | 0.00043  |
| MGMSRv2_2975 | Putative Heat shock protein Hsp20                                                                                   | 2376.64 | 1347.82 | 9.73E-05 |
| MGMSRv2_2998 | Aldehyde dehydrogenase B                                                                                            | 2.22901 | 27.6739 | 1.52E-06 |

|              |                                                           |         |         |          |
|--------------|-----------------------------------------------------------|---------|---------|----------|
| MGMSRv2_3149 | Ferric uptake regulation protein                          | 436.529 | 919.164 | 1.47E-05 |
| MGMSRv2_3185 | Conserved protein of unknown function                     | 44.6195 | 14.4694 | 0.000797 |
| MGMSRv2_3255 | Methylmalonyl-CoA mutase                                  | 156.362 | 90.157  | 0.000905 |
| MGMSRv2_3267 | Conserved protein of unknown function                     | 134.624 | 70.451  | 0.000369 |
| MGMSRv2_3343 | Putative transposase IS66 family                          | 28.2899 | 9.6363  | 7.82E-05 |
| MGMSRv2_3554 | 50S ribosomal protein L19                                 | 567.27  | 314.495 | 0.000785 |
| MGMSRv2_3571 | Conserved protein of unknown function                     | 103.651 | 34.9908 | 1.62E-07 |
| MGMSRv2_3618 | Conserved protein of unknown function                     | 720.419 | 232.547 | 0.000153 |
| MGMSRv2_3701 | Putative bacterioferritin-associated ferredoxin           | 64.835  | 463.702 | 1.48E-06 |
| MGMSRv2_3703 | Bacterioferritin, iron storage and detoxification protein | 121.774 | 244.983 | 0.000656 |
| MGMSRv2_3827 | Cytidylate kinase                                         | 294.328 | 155.519 | 0.000452 |
| MGMSRv2_3979 | Putative cation transport ATPase                          | 4.66052 | 18.5768 | 2.6E-05  |
| MGMSRv2_3980 | Conserved protein of unknown function                     | 0       | 61.5886 | 3.17E-05 |
| MGMSRv2_4010 | Conserved protein of unknown function                     | 36.8684 | 166.686 | 1.47E-06 |
| MGMSRv2_4043 | Elongation factor G (EF-G)                                | 384.862 | 228.427 | 0.000449 |



Table S2. GO enrichment annotation of DEGs, for GO items with  $p < 0.05$ . Data shown: GO accession, description, term type, number of genes in each GO item (DEG item), and gene ID.

| GO_accession | Description                         | Term type          | p_Value    | DEG item | Gene ID                                                                                                                                                                              |
|--------------|-------------------------------------|--------------------|------------|----------|--------------------------------------------------------------------------------------------------------------------------------------------------------------------------------------|
| GO:0015684   | Ferrous iron transport              | Biological process | 0.00040989 | 2        | MGMSRv2_2312, MGMSRv2_0315                                                                                                                                                           |
|              |                                     |                    |            |          | MGMSRv2_2194, MGMSRv2_1309, MGMSRv2_046                                                                                                                                              |
| GO:0055114   | Oxidation-reduction process         | Biological process | 0.008886   | 8        | 8, MGMSRv2_2769, MGMSRv2_2998, MGMSRv2_1323, MGMSRv2_1307, MGMSRv2_1033                                                                                                              |
| GO:0051052   | Regulation of DNA metabolic process | Biological process | 0.047953   | 1        | MGMSRv2_2964                                                                                                                                                                         |
| GO:0065007   | Biological regulation               | Biological process | 0.048199   | 13       | MGMSRv2_2707, MGMSRv2_0428, MGMSRv2_0168, MGMSRv2_3703, MGMSRv2_1691, MGMSRv2_2514, MGMSRv2_0819, MGMSRv2_2964, MGMSRv2_3149, MGMSRv2_0357, MGMSRv2_2724, MGMSRv2_0364, MGMSRv2_2706 |
| GO:0030001   | Metal ion transport                 | Biological process | 0.048491   | 2        | MGMSRv2_2312, MGMSRv2_0315                                                                                                                                                           |

---

|            |                                                    |                    |          |   |                                                                                                    |
|------------|----------------------------------------------------|--------------------|----------|---|----------------------------------------------------------------------------------------------------|
| GO:0046872 | Metal ion binding                                  | Molecular function | 0.001679 | 7 | MGMSRv2_2194,MGMSRv2_1309,MGMSRv2_370<br>3,MGMSRv2_3979,MGMSRv2_2672,MGMSRv2_32<br>55,MGMSRv2_2313 |
| GO:0015093 | Ferrous iron transmembrane<br>transporter activity | Molecular function | 0.00041  | 2 | MGMSRv2_2312,MGMSRv2_0315                                                                          |
| GO:0004601 | Peroxidase activity                                | Molecular function | 0.025066 | 1 | MGMSRv2_2769                                                                                       |

---

Table S3. KEGG enrichment of DEGs, and pathway terms showing the greatest degrees of enrichment. Sample number: number of DEGs participating in the homologous terms. Background genes means the number of genes in the metabolism pathway. ID is the number of the KEGG Orthology (KO), and the detail about the metabolism are available in the KO Database.

| Term                                         | ID      | Sample number | Background number | p-Value  | Genes ID                                                                                                       |
|----------------------------------------------|---------|---------------|-------------------|----------|----------------------------------------------------------------------------------------------------------------|
| Sulfur metabolism                            | ko00920 | 5             | 11                | 4.20E-06 | MGMSRv2_0470, MGMSRv2_2887, MGMSRv2_0469, MGMSRv2_0468, MGMSRv2_1712                                           |
| Cysteine and methionine metabolism           | ko00270 | 4             | 27                | 0.004654 | MGMSRv2_2836, MGMSRv2_2887, MGMSRv2_2672, MGMSRv2_1712                                                         |
| Selenocompound metabolism                    | ko00450 | 2             | 8                 | 0.016779 | MGMSRv2_0470, MGMSRv2_2672                                                                                     |
| Microbial metabolism in diverse environments | ko01120 | 8             | 186               | 0.105627 | MGMSRv2_2194, MGMSRv2_3255, MGMSRv2_0470, MGMSRv2_1712, MGMSRv2_2998, MGMSRv2_0469, MGMSRv2_0468, MGMSRv2_2887 |
| Ribosome                                     | ko03010 | 3             | 52                | 0.150526 | MGMSRv2_1731, MGMSRv2_1732, MGMSRv2_3554                                                                       |

---

|                                               |         |   |     |          |                                                                      |
|-----------------------------------------------|---------|---|-----|----------|----------------------------------------------------------------------|
| Glycerolipid metabolism                       | ko00561 | 1 | 7   | 0.168065 | MGMSRv2_2998                                                         |
| Pentose and glucuronate<br>interconversions   | ko00040 | 1 | 7   | 0.168065 | MGMSRv2_2998                                                         |
| Thiamine metabolism                           | ko00730 | 1 | 8   | 0.189677 | MGMSRv2_0065                                                         |
| Nitrotoluene degradation                      | ko00633 | 1 | 8   | 0.189677 | MGMSRv2_2194                                                         |
| Valine, leucine and<br>isoleucine degradation | ko00280 | 2 | 32  | 0.200559 | MGMSRv2_3255,MGMSRv2_2998                                            |
| Chloroalkane and<br>chloroalkene degradation  | ko00625 | 1 | 9   | 0.210735 | MGMSRv2_2998                                                         |
| Propanoate metabolism                         | ko00640 | 2 | 35  | 0.229378 | MGMSRv2_3255,MGMSRv2_2998                                            |
| Limonene and pinene<br>degradation            | ko00903 | 1 | 12  | 0.270722 | MGMSRv2_2998                                                         |
| One carbon pool by folate                     | ko00670 | 1 | 13  | 0.289699 | MGMSRv2_2672                                                         |
| Folate biosynthesis                           | ko00790 | 1 | 13  | 0.289699 | MGMSRv2_2771                                                         |
| Two-component system                          | ko02020 | 5 | 141 | 0.301271 | MGMSRv2_1691,MGMSRv2_2707,MGMSRv2_2964,MGMSRv2_2724,<br>MGMSRv2_0357 |

---

---

|                                            |         |   |    |          |                                        |
|--------------------------------------------|---------|---|----|----------|----------------------------------------|
| beta-Alanine metabolism                    | ko00410 | 1 | 14 | 0.308189 | MGMSRv2_2998                           |
| Histidine metabolism                       | ko00340 | 1 | 15 | 0.326204 | MGMSRv2_2998                           |
| Biotin metabolism                          | ko00780 | 1 | 16 | 0.343756 | MGMSRv2_1482                           |
| Fatty acid biosynthesis                    | ko00061 | 1 | 16 | 0.343756 | MGMSRv2_1482                           |
| Tryptophan metabolism                      | ko00380 | 1 | 16 | 0.343756 | MGMSRv2_2998                           |
| Lysine degradation                         | ko00310 | 1 | 17 | 0.360856 | MGMSRv2_2998                           |
| Bacterial chemotaxis                       | ko02030 | 3 | 84 | 0.372317 | MGMSRv2_1691,MGMSRv2_2707,MGMSRv2_2724 |
| Fatty acid metabolism                      | ko00071 | 1 | 18 | 0.377516 | MGMSRv2_2998                           |
| Glutathione metabolism                     | ko00480 | 1 | 18 | 0.377516 | MGMSRv2_2769                           |
| Arginine and proline<br>metabolism         | ko00330 | 1 | 29 | 0.534745 | MGMSRv2_2998                           |
| Glycolysis /<br>Gluconeogenesis            | ko00010 | 1 | 32 | 0.57034  | MGMSRv2_2998                           |
| Glyoxylate and<br>dicarboxylate metabolism | ko00630 | 1 | 34 | 0.592562 | MGMSRv2_3255                           |
| Carbon fixation pathways                   | ko00720 | 1 | 37 | 0.623786 | MGMSRv2_3255                           |

---

---

in prokaryotes

|                                       |         |    |     |          |                                                                                                                                                                                       |
|---------------------------------------|---------|----|-----|----------|---------------------------------------------------------------------------------------------------------------------------------------------------------------------------------------|
| Metabolic pathways                    | ko01100 | 14 | 571 | 0.638825 | MGMSRv2_1482,MGMSRv2_0065,MGMSRv2_3255,MGMSRv2_2771,MGMSRv2_3827,MGMSRv2_2836,MGMSRv2_2887,MGMSRv2_0470,MGMSRv2_1712,MGMSRv2_2998,MGMSRv2_0469,MGMSRv2_0468,MGMSRv2_1323,MGMSRv2_2672 |
| Pyruvate metabolism                   | ko00620 | 1  | 39  | 0.643277 | MGMSRv2_2998                                                                                                                                                                          |
| Pyrimidine metabolism                 | ko00240 | 1  | 40  | 0.652645 | MGMSRv2_3827                                                                                                                                                                          |
| Oxidative phosphorylation             | ko00190 | 1  | 48  | 0.719349 | MGMSRv2_1323                                                                                                                                                                          |
| Purine metabolism                     | ko00230 | 1  | 64  | 0.817114 | MGMSRv2_0470                                                                                                                                                                          |
| Nitrogen metabolism                   | ko00910 | 1  | 69  | 0.840101 | MGMSRv2_1323                                                                                                                                                                          |
| ABC transporters                      | ko02010 | 2  | 125 | 0.843603 | MGMSRv2_1571,MGMSRv2_2175                                                                                                                                                             |
| Biosynthesis of secondary metabolites | ko01110 | 2  | 264 | 0.993884 | MGMSRv2_2672,MGMSRv2_2998                                                                                                                                                             |

---

Table S4. Transcription factors (TFs) predicted for regulation of DEGs.

| Transcription factor |                                 | Candidate in MSR-1 |                                            | Identity (%) | Number of regulated genes |                 | p-Value* |
|----------------------|---------------------------------|--------------------|--------------------------------------------|--------------|---------------------------|-----------------|----------|
| Name                 | Strain                          | Gene               | Gene product                               |              | Up- regulated             | Down- regulated |          |
| Fur                  | <i>M. gryphiswaldense</i> MSR-1 | MGMSRv2_3137       | Ferric uptake regulator                    | 100%         | 3                         | 6               | 0.0062   |
| CytR                 | <i>E. coli</i> (strain K12)     | MGMSRv2_1275       | D-ribose-binding periplasmic protein       | 25.61        | 11                        | 9               | 0.042    |
| Crp                  | <i>E. coli</i> (strain K12)     | MGMSRv2_1601       | Catabolite gene activator                  | 29.27        | 18                        | 9               | 0.029    |
| NarL                 | <i>P. aeruginosa</i> (PAO1)     | MGMSRv2_0839       | Putative oxygen regulatory protein         | 34.29        | 26                        | 8               | 0.032    |
| SigH                 | <i>B. subtilis</i> (strain 168) | MGMSRv2_3016       | Sigma D factor of RNA polymerase           | 27.27        | 9                         | 7               | 0.036    |
| GerE                 | <i>B. subtilis</i> (strain 168) | MGMSRv2_4022       | Putative transcriptional activator protein | 47.46        | 19                        | 9               | 0.017    |

\* p-value <0.05

Table S5. Information on DEGs from comparison of iron-controlled vs. oxygen-controlled transcriptomes, and descriptions of COG classifications.

| Gene_ID      | Gene products                                                                       | FPKM<br>(high-oxygen) | FPKM<br>(low-oxygen) | Fold change<br>(high-oxygen/low-<br>oxygen) | FPKM<br>(high-iron) | FPKM<br>(low-iron) | Fold change<br>(high-iron/low-<br>iron) | COG  |
|--------------|-------------------------------------------------------------------------------------|-----------------------|----------------------|---------------------------------------------|---------------------|--------------------|-----------------------------------------|------|
| MGMSRv2_1306 | Conserved protein of unknown function,<br>containing cyclic nucleotide-binding-like | 76.0485               | 222.455              | 0.34186                                     | 70.312              | 17.7562            | 3.9598563                               | T    |
| MGMSRv2_1307 | Putative dihydroorotate dehydrogenase<br>(electron transfer subunit)                | 43.9466               | 152.609              | 0.287969                                    | 109.376             | 43.0799            | 2.5389103                               | C    |
| MGMSRv2_1613 | Protein of unknown function                                                         | 19.0019               | 58.5595              | 0.324489                                    | 62.607              | 30.2113            | 2.0723041                               | None |
| MGMSRv2_2514 | Signal transduction histidine kinase                                                | 37.1615               | 149.858              | 0.247978                                    | 71.4568             | 39.1659            | 1.8244646                               | T    |
| MGMSRv2_2515 | Protein of unknown function                                                         | 172.191               | 576.437              | 0.298716                                    | 549.26              | 202.796            | 2.7084361                               | None |
| MGMSRv2_2832 | Putative Cytochrome c domain                                                        | 6.71356               | 169.17               | 0.039685                                    | 107.569             | 11.259             | 9.5540457                               | C    |
| MGMSRv2_0065 | Thiamine biosynthesis protein ThiC                                                  | 284.799               | 60.9792              | 4.670429                                    | 52.6395             | 125.04             | 0.4209813                               | H    |
| MGMSRv2_0357 | Nif-specific regulatory protein                                                     | 185.057               | 51.9591              | 3.56159                                     | 16.3435             | 34.618             | 0.4721099                               | T    |
| MGMSRv2_2312 | FeoB1                                                                               | 179.243               | 59.8701              | 2.993865                                    | 137.097             | 426.908            | 0.3211394                               | P    |
| MGMSRv2_2769 | Putative bacillithiol peroxidase                                                    | 118.82                | 35.0817              | 3.386951                                    | 127.469             | 335.863            | 0.3795268                               | O    |



|              |                                                              |         |         |          |         |         |           |      |
|--------------|--------------------------------------------------------------|---------|---------|----------|---------|---------|-----------|------|
| MGMSRv2_2779 | Exported protein of unknown function                         | 101.485 | 30.0468 | 3.377564 | 129.091 | 289.463 | 0.4459672 | None |
| MGMSRv2_2964 | Putative Chromosomal replication initiator                   | 225.877 | 68.9921 | 3.273955 | 216.4   | 436.203 | 0.4960993 | L    |
| MGMSRv2_2998 | Aldehyde dehydrogenase B                                     | 113.377 | 2.9239  | 38.77595 | 2.22901 | 27.6739 | 0.0805456 | C    |
| MGMSRv2_3703 | Bacterioferritin, iron storage and<br>detoxification protein | 127.898 | 37.135  | 3.444136 | 121.774 | 244.983 | 0.4970712 | P    |
| MGMSRv2_4010 | Conserved protein of unknown function                        | 841.828 | 161.666 | 5.207205 | 36.8684 | 166.686 | 0.2211847 | R    |
| MGMSRv2_0533 | Putative acetyl esterase                                     | 237.963 | 35.9135 | 6.626004 | 163.246 | 32.2799 | 5.0572028 | I    |
| MGMSRv2_2724 | Methyl-accepting chemotaxis sensory<br>transducer            | 54.9298 | 16.725  | 3.284293 | 78.2134 | 41.2363 | 1.8967124 | NT   |

\*COG classification: A, RNA processing and modification; B, Chromatin structure and dynamics; C, Energy production and conversion; D, Cell cycle control, cell division, chromosome partitioning; E, Amino acid transport and metabolism; F, Nucleotide transport and metabolism; G, Carbohydrate transport and metabolism; H, Coenzyme transport and metabolism; I, Lipid transport and metabolism; J, Translation, ribosomal structure and biogenesis; K, Transcription; L, Replication, recombination and repair; M, Cell wall/membrane/envelope biogenesis; N, Cell motility; O, Posttranslational modification, protein turnover, chaperones; P, Inorganic ion transport and metabolism; Q, Secondary metabolites biosynthesis, transport and catabolism; R, General function prediction only; S, Function unknown; T, Signal transduction mechanisms; U, Intracellular trafficking, secretion, and vesicular transport; V, Defense mechanisms; W, Extracellular structures; Y, Nuclear structure; Z, Cytoskeleton; None, No COG.

Table S6. *mam* genes showing no significant difference in transcription level.

| Gene ID      | Gene             | FPKM(high-iron) | FPKM(low-iron) | Log2(fold change) | q value | Significant |
|--------------|------------------|-----------------|----------------|-------------------|---------|-------------|
| MGMSRv2_2321 | <i>mamY</i>      | 163.961         | 139.092        | -0.237309         | 0.68    | no          |
| MGMSRv2_2322 | <i>mamX</i>      | 205.689         | 190.091        | -0.113775         | 0.86    | no          |
| MGMSRv2_2323 | <i>mamZ</i>      | 146.976         | 117.216        | -0.326413         | 0.52    | no          |
| MGMSRv2_2324 | <i>ftsZ-like</i> | 50.6803         | 60.9183        | 0.265451          | 0.71    | no          |
| MGMSRv2_2365 | <i>mamU</i>      | 27.0006         | 35.4416        | 0.392453          | 0.67    | no          |
| MGMSRv2_2366 | <i>mamT</i>      | 154.279         | 98.1922        | -0.651858         | 0.27    | no          |
| MGMSRv2_2367 | <i>mamS</i>      | 194.202         | 196.302        | 0.0155171         | 0.98    | no          |
| MGMSRv2_2368 | <i>mamB</i>      | 490.283         | 461.045        | -0.0887098        | 0.87    | no          |
| MGMSRv2_2369 | <i>mamR</i>      | 767.922         | 554.678        | -0.469309         | 0.42    | no          |
| MGMSRv2_2370 | <i>mamQ</i>      | 554.827         | 542.54         | -0.0323096        | 0.96    | no          |
| MGMSRv2_2371 | <i>mamA</i>      | 640.641         | 619.297        | -0.0488855        | 0.94    | no          |
| MGMSRv2_2372 | <i>mamP</i>      | 418.758         | 332.74         | -0.33172          | 0.51    | no          |
| MGMSRv2_2373 | <i>mamO</i>      | 416.398         | 395.043        | -0.0759548        | 0.88    | no          |
| MGMSRv2_2374 | <i>mamN</i>      | 217.392         | 208.96         | -0.0570714        | 0.93    | no          |
| MGMSRv2_2375 | <i>mamM</i>      | 371.099         | 295.753        | -0.327411         | 0.50872 | no          |
| MGMSRv2_2376 | <i>mamL</i>      | 518.68          | 286.652        | -0.855545         | 0.16    | no          |
| MGMSRv2_2377 | <i>mamK</i>      | 220.051         | 189.702        | -0.214099         | 0.70    | no          |
| MGMSRv2_2378 | <i>mamJ</i>      | 240.09          | 186.516        | -0.364277         | 0.47    | no          |
| MGMSRv2_2379 | <i>mamE</i>      | 632.474         | 520.322        | -0.2816           | 0.50    | no          |
| MGMSRv2_2380 | <i>mamI</i>      | 449.657         | 544.552        | 0.276244          | 0.73    | no          |
| MGMSRv2_2381 | <i>mamH</i>      | 168.118         | 138.026        | -0.284529         | 0.60    | no          |
| MGMSRv2_2393 | <i>mamC</i>      | 133.093         | 78.1884        | -0.767408         | 0.28    | no          |
| MGMSRv2_2394 | <i>mamD</i>      | 287.129         | 182.447        | -0.654221         | 0.15    | no          |
| MGMSRv2_2395 | <i>mamF</i>      | 735.742         | 558.147        | -0.398554         | 0.46    | no          |
| MGMSRv2_2396 | <i>mms6</i>      | 93.6725         | 47.2774        | -0.986476         | 0.17    | no          |
| MGMSRv2_2411 | <i>mamW</i>      | 296.288         | 231.746        | -0.354451         | 0.55    | no          |

(all q value&gt;0.05)

Table S7. Primers used in this study.

| Gene name   | Location     | Prime name | Sequence (5'-3')       | Product length (bp) |
|-------------|--------------|------------|------------------------|---------------------|
| <i>mamC</i> | MGMSRv2_2393 | C-F        | CCGCCGCCCTTGCCAAGAAT   | 165                 |
|             |              | C-R        | GCTCCCAACGAGACCA       |                     |
| <i>mamE</i> | MGMSRv2_2379 | E-F        | ATAGCGTGGTTAGCGTGA     | 224                 |
|             |              | E-R        | CCACATCGTCCTTTACGGT    |                     |
| <i>mamK</i> | MGMSRv2_2377 | K-F        | TGGTTGGATACCCGAAG      | 215                 |
|             |              | K-R        | AAATCTCGTCGTTGGCG      |                     |
| <i>mamO</i> | MGMSRv2_2373 | O-F        | TCTTCCTGACCAATGTCGT    | 213                 |
|             |              | O-R        | ATTTCCAACACCGCCTTG     |                     |
| <i>mamA</i> | MGMSRv2_2371 | A-F        | TGCTTGATGAAGTTACCCCTG  | 178                 |
|             |              | A-R        | ACCACTGCCTCGGAATAA     |                     |
| <i>mamB</i> | MGMSRv2_2368 | B-F        | CTGATGTATGGGTCGGTGGT   | 177                 |
|             |              | B-R        | AACGGTTGTCCCAGGCATT    |                     |
| <i>mamJ</i> | MGMSRv2_2378 | J-F        | ACCCGCCAGCCTAACAAGAT   | 189                 |
|             |              | J-R        | CGACCACATTGCTTCCAAC    |                     |
| <i>mms6</i> | MGMSRv2_2396 | mms6-F     | AAGGTTGGCGCGGGCAAGGT   | 249                 |
|             |              | mms6-R     | CCCCCAAGCCCCAAGGCCATA  |                     |
| <i>mamX</i> | MGMSRv2_2322 | X-F        | CGCTGTTCAATGCCAATC     | 261                 |
|             |              | X-R        | CAACGCTGCCCTTCTTCA     |                     |
| <i>mamY</i> | MGMSRv2_2321 | Y-F        | CCCAGGAAATCACCCAAGA    | 246                 |
|             |              | Y-R        | CGAAATAGGCGTTAGTCAGG   |                     |
| <i>mamZ</i> | MGMSRv2_2324 | Z-F        | GCCCGGTGCAGGAGATTACT   | 231                 |
|             |              | Z-R        | TCTGGCTGTTGGTGGAGGTG   |                     |
| <i>rpoC</i> | MGMSRv2_0030 | rpoC-F     | ATCCGTATTTCCATCGCCTCCC | 164                 |
|             |              | rpoC-R     | TTGCCGCACAAGCATTCGT    |                     |
